# Supplementary material for: Genetic dissection of Arabidopsis MAP kinase phosphatase 1-dependent PAMP-induced transcriptional responses
Source: PubMed Central journal article supplement (PMC5853853; doi:10.1093/jxb/erx335), 2017-10-13
Supplement: erx335_suppl_supplementary_figure_s1_tables_s1-s3.pdf [file erx335_suppl_supplementary_figure_s1_tables_s1-s3.pdf]

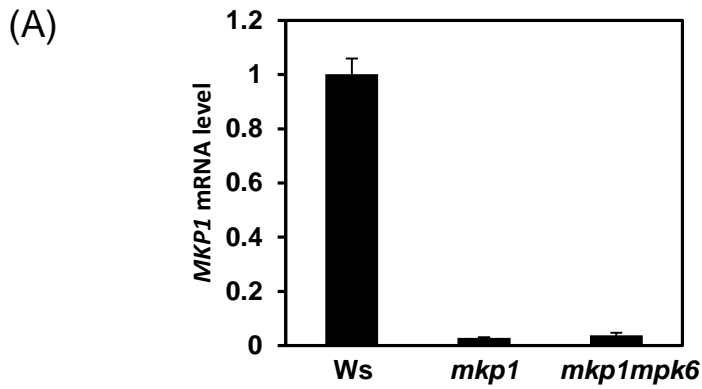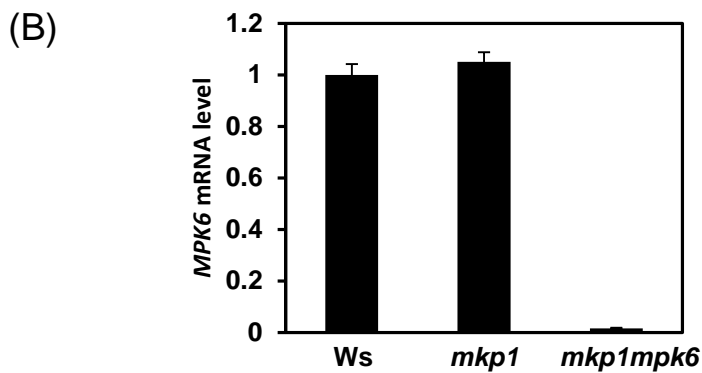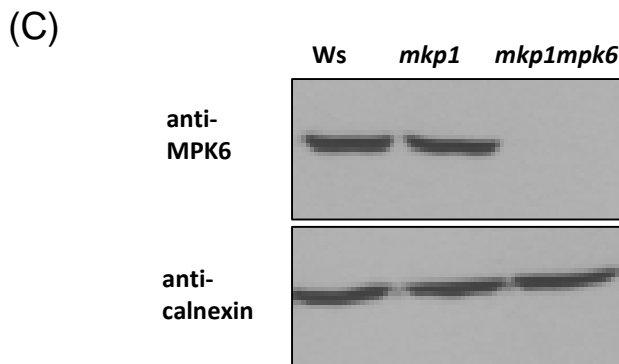

**Figure S1. Genotyping of *mkp1* and *mkp1mpk6* mutants**

- (A) qPCR analysis of *MKP1* transcripts in total RNA from untreated 12-day-old seedlings. Each sample was RNA pooled from 6-8 seedlings and three samples per genotype were analyzed. Graphed are means  $\pm$ SE, n=3.
- (B) qPCR analysis of *MPK6* transcripts in total RNA from untreated 12-day-old seedlings. Each sample was RNA pooled from 6-8 seedlings and three samples per genotype were analyzed. Graphed are means  $\pm$ SE, n=3.
- (C) Immunoblot analysis of protein extracts from untreated 12-day-old seedlings using specific anti-MPK6 (upper panel) or anti-calnexin (lower panel) antibodies for loading control.

**Supplementary Table S1. qRT-PCR primers used in this study**

| <b>Gene</b>      | <b>AGI number</b> | <b>Primer</b>                                                             |
|------------------|-------------------|---------------------------------------------------------------------------|
| <i>MKP1</i>      | At3g55270         | Fw: 5'-CCTGAAAGGATCTCTGAAGTTGCC-3'<br>Rev: 5'-CCGTTTCTAATACCCTCCAGATTG-3' |
| <i>MPK6</i>      | At2g43790         | Fw: 5'-CTCGTTGCACGACATAAGCG-3'<br>Rev: 5'-CGCCTCGCGGTAGATTAGTT-3'         |
| <i>AP2/ERFa</i>  | At5g51190         | Fw: 5'-TTAACGCCATCAAGTTGGAAG-3'<br>Rev: 5'-TCCAAGAGATGGACAAGGAGA-3'       |
| <i>STZ</i>       | At1g27730         | Fw: 5'-GCCACGTTAGCAGTAGCCA-3'<br>Rev: 5'-ACCGAAAGTCAAACCGAGG-3'           |
| <i>At1g13470</i> | At1g13470         | Fw: 5'-ACAAGCGTTGTGGTAGGAAA-3'<br>Rev: 5'-AACCTCCTCCCATCTTTGTAGA-3'       |
| <i>JAV1</i>      | At3g22160         | Fw: 5'-GGCTTTCGGGTCCGGTAATA-3'<br>Rev: 5'-CGCGTGAGGCTGGAAATTAT-3'         |
| <i>CRK20</i>     | At4g23280         | Fw: 5'-TTCAACGTTGAAAAGGCGGA-3'<br>Rev: 5'-TTTTCTCTTAGCGCGGCGG-3'          |
| <i>CYP81D8</i>   | At4g37370         | Fw: 5'-GGAAGTGGCTCATCGGCTTAT-3'<br>Rev: 5'-GGCATTGTAACACCTTTGCC-3'        |
| <i>At5g59080</i> | At5g59080         | Fw: 5'-CATGGCTCACAAGCTCAACG-3'<br>Rev: 5'-TTGGTTGGTGGTGGATCGAG-3'         |
| <i>At1g23390</i> | At1g23390         | Fw: 5'-TTATGGCTGGGATCATCGGA-3'<br>Rev: 5'-TCTCAAATACGTCTCAGGCA-3'         |
| <i>bHLH100</i>   | At2g41240         | Fw: 5'-CAGAGCTGCAAGAGCAAGTT-3'<br>Rev: 5'-ACGCATAGCTTGTAACCCCTT-3'        |
| <i>WRKY41</i>    | At4g11070         | Fw: 5'-CACACAACACAATCCAACGATAG-3'<br>Rev: 5'-ACTCTTCGCTTCTCGGATTC-3'      |
| <i>CYP79B2</i>   | At4g39950         | Fw: 5'-CAGGATGGCCGATCATTGGA-3'<br>Rev: 5'-GCTGCTTCATGATGCTGTGG-3'         |
| <i>At4g20000</i> | At4g20000         | Fw: 5'-TGGATTTTCGGTCTCCCACT-3'<br>Rev: 5'-GCTCGTACTCACGTGTTGG-3'          |
| <i>At4g22610</i> | At4g22610         | Fw: 5'-TGTCTGCATCTGCGATTCCA-3'<br>Rev: 5'-GATAGTCCGCTCCGCAAAGG-3'         |
| <i>CYP71A13</i>  | At2g30770         | Fw: 5'-CGATTCCTCAAACGAACCGC-3'<br>Rev: 5'-TACCTGAGACTGAGGGACCG-3'         |
| <i>WSD1</i>      | At5g37300         | Fw: 5'-TGGCGAAGGGTTCAAAGTGT-3'<br>Rev: 5'-TCCATCGTAGCTTTGGCTCG-3'         |
| <i>PHI-1</i>     | At1g35140         | Fw: 5'-GACTCAGTCTCTCCCTCGGA-3'<br>Rev: 5'-TAGCTTTGGCCACCTTTTGC-3'         |
| <i>At1g33610</i> | At1g33610         | Fw: 5'-CACGGTGGCTGGTCTACAAA-3'<br>Rev: 5'-GGAGAAAGTGGAGAGCCACA-3'         |
| <i>At1g49470</i> | At1g49470         | Fw: 5'-ATCCTTCTCTGCGGCTCTATT-3'<br>Rev: 5'-ACCCCATGTTCAAGAACCAGC-3'       |
| <i>ASG5</i>      | At1g20650         | Fw: 5'-ATCGACCGTTCATAGGTGACAT-3'<br>Rev: 5'-TTCTTGAATCTCTGGTGACGGT-3'     |

**Supplementary Table S2. RNAseq reads and mapping statistics**

| <b>Sample</b>     | <b>Total reads</b> | <b>Reads mapped</b> | <b>Percentage mapped</b> |
|-------------------|--------------------|---------------------|--------------------------|
| Ws_0_r1           | 28464813           | 25455616            | 89.43%                   |
| Ws_0_r2           | 28084244           | 25135755            | 89.50%                   |
| Ws_0_r3           | 25472221           | 22758060            | 89.34%                   |
| Ws_30_r1          | 27114807           | 24271396            | 89.51%                   |
| Ws_30_r2          | 23385907           | 20962479            | 89.64%                   |
| Ws_30_r3          | 28232682           | 25264976            | 89.49%                   |
| Ws_90_r1          | 25033996           | 22410590            | 89.52%                   |
| Ws_90_r2          | 35682508           | 31937051            | 89.50%                   |
| Ws_90_r3          | 27755215           | 24804288            | 89.37%                   |
| <i>mkp1_0_r1</i>  | 23715130           | 21133020            | 89.11%                   |
| <i>mkp1_0_r2</i>  | 26512288           | 23646642            | 89.19%                   |
| <i>mkp1_0_r3</i>  | 22533079           | 20078407            | 89.11%                   |
| <i>mkp1_30_r1</i> | 27287352           | 24358068            | 89.27%                   |
| <i>mkp1_30_r2</i> | 23754657           | 21200605            | 89.25%                   |
| <i>mkp1_30_r3</i> | 25880226           | 23044514            | 89.04%                   |
| <i>mkp1_90_r1</i> | 26511655           | 23683342            | 89.33%                   |
| <i>mkp1_90_r2</i> | 39427945           | 35196352            | 89.27%                   |
| <i>mkp1_90_r3</i> | 21840801           | 19495129            | 89.26%                   |
| mm6_0_r1          | 26083896           | 23256381            | 89.16%                   |
| mm6_0_r2          | 25944302           | 23159288            | 89.27%                   |
| mm6_0_r3          | 25541526           | 22809792            | 89.30%                   |
| mm6_30_r1         | 27486329           | 24520879            | 89.21%                   |
| mm6_30_r2         | 31620116           | 28212006            | 89.22%                   |
| mm6_30_r3         | 26158912           | 23317215            | 89.14%                   |
| mm6_90_r1         | 24185982           | 21561388            | 89.15%                   |
| mm6_90_r2         | 37488452           | 33420508            | 89.15%                   |
| mm6_90_r3         | 26208281           | 23356334            | 89.12%                   |
| total             | 737407322          | 658450081           | 89.29%                   |

mm6: *mkp1 mpk6*

**Supplementary Table S3. Number of PAMP responsive transcripts at 30 min and 90 min post elf26 elicitation**

|                                         | <b>30min</b> | <b>90min</b> |
|-----------------------------------------|--------------|--------------|
| <b>elf26 up-regulated transcripts</b>   | <b>2114</b>  | <b>2995</b>  |
| <b>elf26 down-regulated transcripts</b> | <b>781</b>   | <b>2994</b>  |
| <b>Total</b>                            | <b>2895</b>  | <b>5989</b>  |
